# Supplementary material for: Integrating magnetic Co-nanopillars in a NbN-based VAN thin film as a multifunctional hybrid metamaterial
Source: Royal Society of Chemistry journal article supplement (doi:10.1039/d4mh01281j), 2025-01-01
Supplement: d4mh01281j1.pdf [file d4mh01281j1.pdf]

## **Integrating magnetic Co-nanopillars in NbN-based VAN thin films as a multifunctional hybrid metamaterial**

Yizhi Zhang,<sup>1</sup> Zedong Hu,<sup>3</sup> Amirr Dion Neal,<sup>1</sup> Claire Amelia Mihalko,<sup>1</sup> Lizabeth Quigley,<sup>1</sup> Ping Lu,<sup>2</sup> Wei Pan,<sup>2</sup> Debargha Paul,<sup>1</sup> Benson Kunhung Tsai,<sup>1</sup> Shiyu Zhou,<sup>1</sup> Jianan Shen,<sup>1</sup> Xinghang Zhang,<sup>1</sup> Haiyan Wang<sup>1,3\*</sup>

<sup>1</sup> *School of materials engineering, Purdue University, West Lafayette, 47907, USA*

<sup>2</sup> *Sandia National Laboratories, Albuquerque, NM 87185, USA*

<sup>3</sup> *School of Electrical and Computer Engineering, Purdue University, West Lafayette, 47907, USA*

\* Address correspondence to: [hwang00@purdue.edu](mailto:hwang00@purdue.edu) (Haiyan Wang)

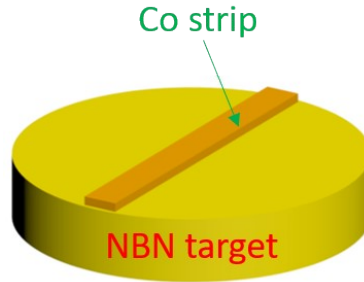

**Fig.S1** Target for NbN and Co deposition.

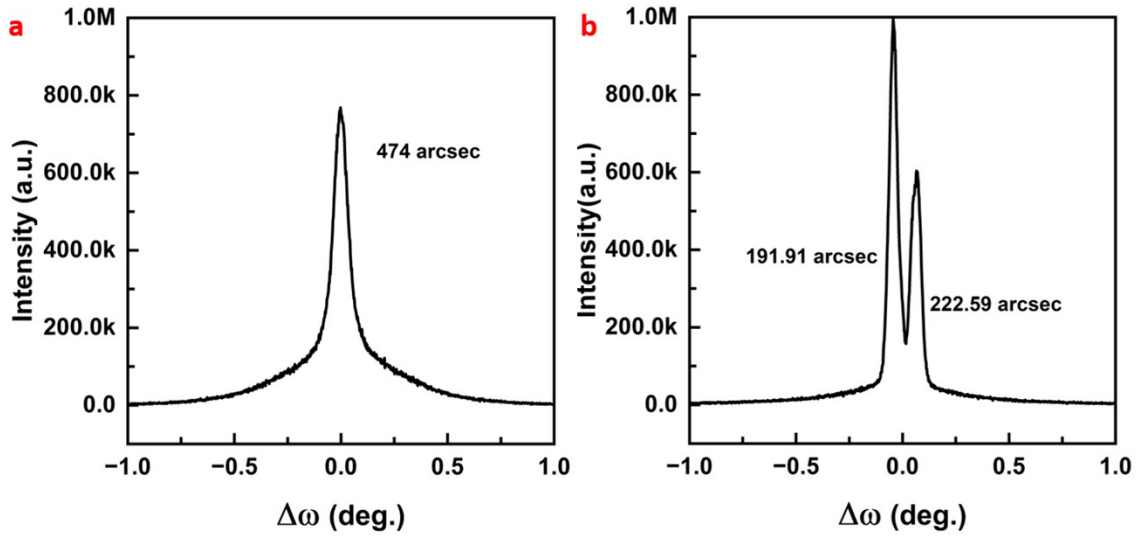

**Fig.S2** Rocking curve of (a) pure NbN and (b) NbN-Co nanocomposite thin films.

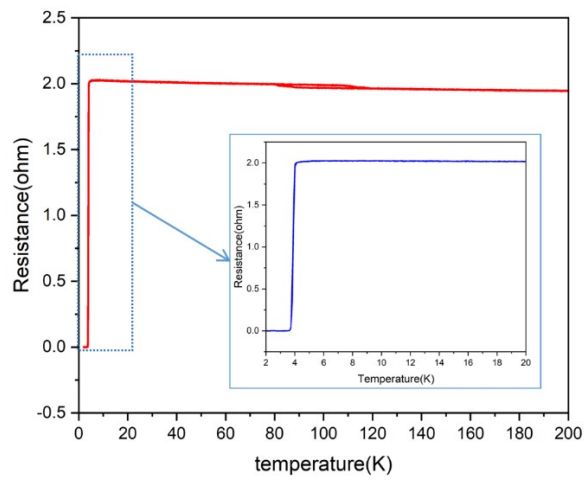

**Fig.S3** RT measurement of pure NbN thin film, and it shows superconductivity with the transition temperature at 4K.

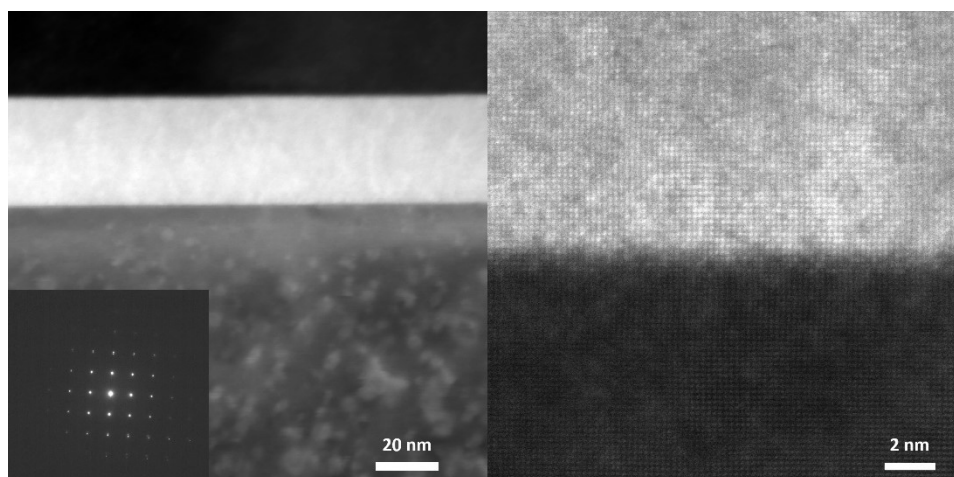

**Fig.S4** STEM and diffraction pattern of pure NbN on MgO. It shows cube-on-cube epitaxial interface.

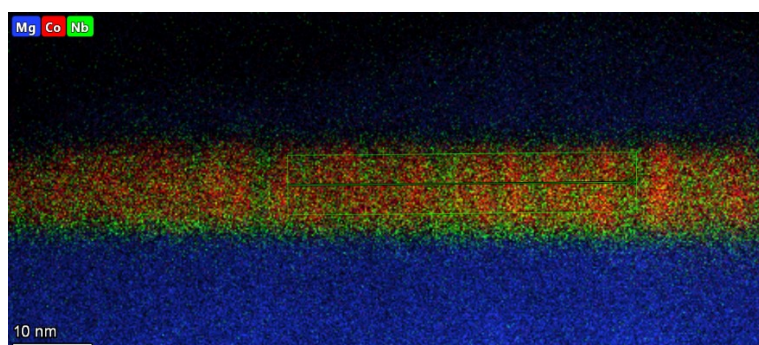

**Fig.S5** EDS mapping of cross-sectional of NbN-Co thin film with a wide Co strip.

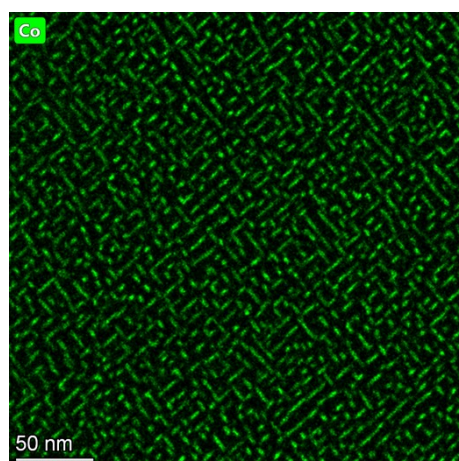

**Fig.S6** Low mag Co EDS mapping image.

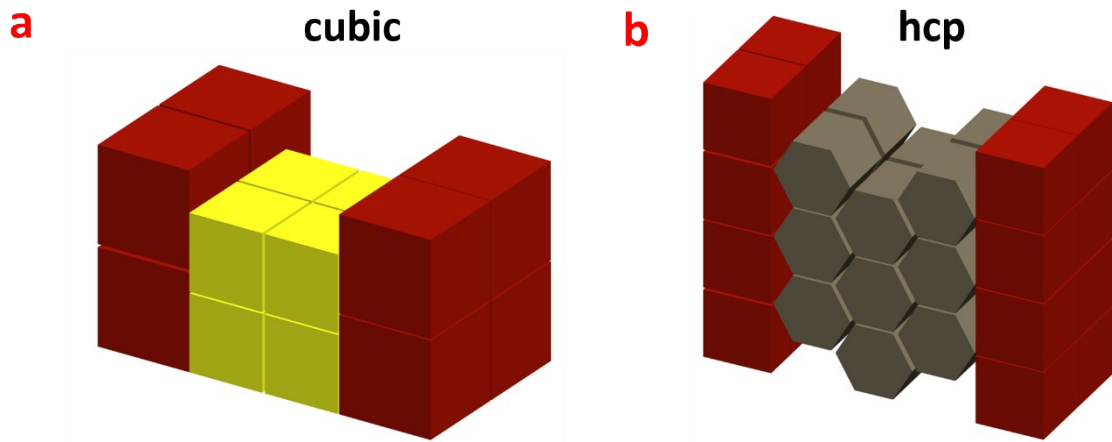

**Fig.S7** Schematic drawing of cubic and hcp Co embedded inside NbN matrix.

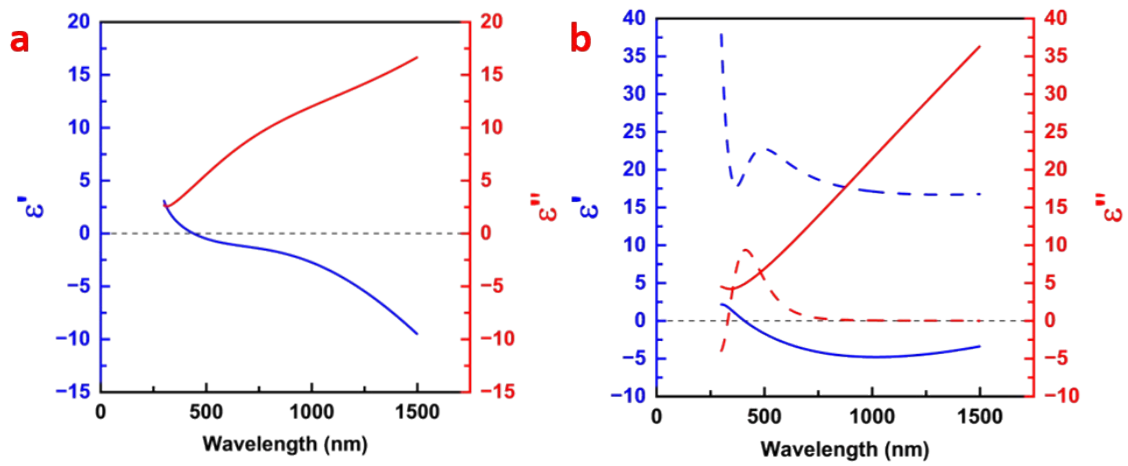

**Fig. S8** The optical permittivity data fitted from the RC2 ellipsometry measurements from (a) pure NbN and (b) NbN-Co nanocomposite. In the (b) part, the solid line is in-plane direction, and the dashed line is out-of-plane direction.
